# Supplementary material
Source: Springer Nature journal article supplement (https://www.springermedizin.de/resource/supplementary/13063_2008_271_MOESM1_ESM.pdf/9622444)

Review: Perioperative Oxygen Fraction  
 Comparison: 01 FiO2=0.80 vs. (FiO2=0.30 / 0.35)  
 Outcome: 01 Surgical Site Infection

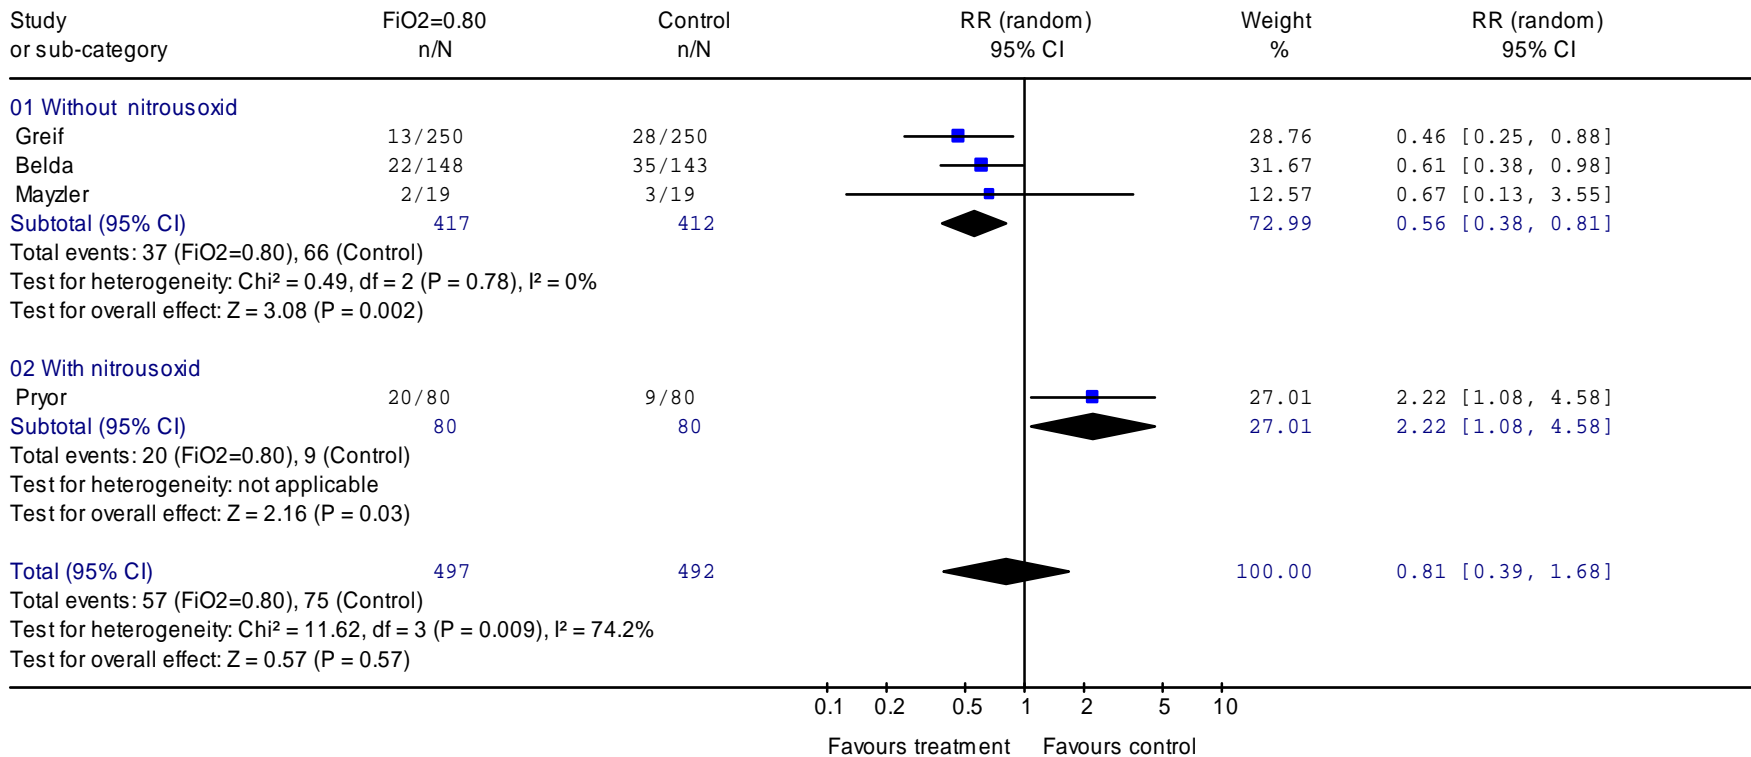

Supplement: MOESM1 [file 9622444]
